# Supplementary material for: Microviridae Goes Temperate: Microvirus-Related Proviruses Reside in the Genomes of Bacteroidetes
Source: PubMed Central journal article supplement (PMC3091885; doi:10.1371/journal.pone.0019893), 2011-05-10
Supplement: pone.0019893.s001.pdf [file pone.0019893.s001.pdf]

|                                           |       | Motif I     |       | Motif II          |     | Motif III         |       |           |
|-------------------------------------------|-------|-------------|-------|-------------------|-----|-------------------|-------|-----------|
| 237722023_BMV1                            | 5 7   | F I T L T Y | 9 4   | F R P H Y H L L L | 3 2 | C S N Y V A S Y V | 2 0 7 | ( 4 9 7 ) |
| 218131115_BMV2                            | 5 8   | F I T L T Y | 9 4   | F R P H Y H I L L | 3 2 | C S S Y V A G Y V | 2 0 8 | ( 4 9 9 ) |
| 198274653_BMV3                            | 5 6   | F L T L T F | 9 5   | F R P H F H I L L | 6 2 | C S S Y V A G Y V | 2 3 7 | ( 5 4 5 ) |
| 288927737_BMV4                            | 5 9   | M F T L T Y | 1 0 8 | L R P H Y H G I I | 5 3 | T A Y Y V A E Y V | 2 4 4 | ( 5 6 9 ) |
| 282877219_BMV5                            | 6 1   | F F T L T Y | 1 1 5 | Y R P H Y H G I L | 5 3 | T A Y Y V A S Y V | 2 5 3 | ( 5 8 2 ) |
| 9634955_Chlamydia microvirus Chp2         | 1 0 5 | F L T L T Y | 4 4   | Q R P H Y H L L I | 4 2 | S A G Y V A R Y S | 2 1 5 | ( 3 3 6 ) |
| 12085145_Bdellovibrio microvirus φMH2K    | 6 4   | F L T L T Y | 5 0   | K R P H W H V L I | 4 3 | S A S Y V A R Y A | 1 8 1 | ( 3 1 5 ) |
| 19424731_Spiroplasma microvirus SpV4      | 7 5   | F V T L T Y | 5 1   | M R P H Y H I C F | 4 3 | S A N Y T A R Y T | 1 9 3 | ( 3 2 0 ) |
| 9625356_Enterobacteria microvirus α3      | 1 8 3 | F D T L T L | 5 4   | G R L H W H V V H | 7 1 | V A W Y V T K Y V | 3 3 2 | ( 3 4 5 ) |
| 125661610_Enterobacteria microvirus φX174 | 1 9 9 | F D T L T L | 5 4   | G R L H F H A V H | 7 1 | V G F Y V A K Y V | 3 4 8 | ( 3 4 6 ) |
| 75093009_Xanthomonas inoivirus Lf         | 1 5 8 | F L T L T Y | 4 8   | F R P H Y H V M L | 2 9 | C V G Y L A K Y A | 2 5 9 | ( 4 9 4 ) |
| 45597172_Spiroplasma inoivirus SVTS2      | 9 6   | F L T L T Y | 4 9   | G A V H F H I I L | 3 0 | V V K Y L A K Y I | 1 9 9 | ( 3 0 9 ) |
| 74095490_Spiroplasma inoivirus SVGII3     | 9 9   | F T L T L Y | 4 7   | G A V H F H I I F | 3 0 | V S K Y V A K Y V | 2 0 0 | ( 5 1 3 ) |

**Figure S1.** Alignment of the three conserved motifs (I–III) of superfamily I rolling circle replication proteins with corresponding motifs from the putative replication proteins of the BMV proviruses. The protein sequences are denoted by their GenBank identifiers followed by the corresponding (pro)virus name. The limits of the depicted motifs are indicated by the residue positions on each side of the alignment, with the total length of the protein given in parenthesis. The numbers within the alignment indicate the distance between the motifs.
