# Supplementary material for: Microviridae Goes Temperate: Microvirus-Related Proviruses Reside in the Genomes of Bacteroidetes
Source: PubMed Central journal article supplement (PMC3091885; doi:10.1371/journal.pone.0019893), 2011-05-10
Supplement: pone.0019893.s002.pdf [file pone.0019893.s002.pdf]

```

BMV6-P4      1 M--E L S I--Y F P H L-----S A A Q L-----E V M S R R A D Y T S S 27
BMV1-P4      1 M W Q K R-R I E P Y V T P V R E N I V G S K E M Q C S E F R E E S P V D Q F L F Q E V S V D G D T 49
φMH2K        1 M--K-K I E--L R P N-----G T K L V-----H T V N E L P P E T D Q 26

BMV6-P4      28 G V C L N S K A N E E C D V I C P Y D E K L K R R P N V L S K V M D P N V N P L E R E R L M S T L Q 77
BMV1-P4      50 S I R L S-----S D I Y M L F N Q-----R L D K-----L S Q T S L L E Y F N 79
φMH2K        27 S F G K E-----C D I N F I-----V R K-----F I K T G Q I T H L A 51

BMV6-P4      78 K V P-----V S K-----R N N L-----S D D E L I S M T P S R Y N O T M T D-----106
BMV1-P4      80 N I S-----V T E P R F N E L R S K L-----G D E Q L I S F V K S R F I Q S K S E L M A W 118
φMH2K        52 R R Q G F Y G D Q S S I P D F Q T A M D T V T K A Q Q A F D E L P A H M R K R F A N S P H E L M Q F 101

BMV6-P4      107-----D A A F A S H L S H V V D D Y S D S D S A S S S Q G S D N S D S S N S D S-----144
BMV1-P4      119 S N Y L M N S T D E Q I A A-L A-----S A Q S Q Q T Q Q S V Q P V E P V S M E-----154
φMH2K        102 L Q D P K N-R D E A I S L G L M E M V E T P Q Q A P Q S T I N Q T T K P A P A S G E P T P V P T 150

```

**Figure S2.** Multiple alignment of the putative internal scaffolding proteins from BMVs 1 and 6 with the VP3 protein from *Bdellovibrio gokushovirus* φMH2K (GI:12085142).
